# Supplementary material
Source: PubMed Central journal article supplement (PMC1307620)
Supplement: 3-embor063-s1.pdf [file 3-embor063-s1.pdf]

## **Supplementary Material**

### **Depletion of MOM1 in non-dividing cells of *Arabidopsis* plants releases transcriptional gene silencing**

**<sup>1</sup>Muhammad Tariq, <sup>2</sup>Yoshiki Habu, Jerzy Paszkowski**

Friedrich Miescher Institute for Biomedical Research, Maulbeerstrasse 66, 4058 Basel, Switzerland

<sup>1</sup>Corresponding author: Tel: 41 61 6975583; Fax: 41 61 6973976; E-mail: tariq@fmi.ch

<sup>2</sup>Present address: National Institute of Agrobiological Science, Tsukuba 305-8602, Ibaraki, Japan

Running title: Release of silencing in non-dividing cells of *Arabidopsis*

### Plasmid construction and plant transformation

A fragment of 503 bp, which comprises the 3' end of the open reading frame and the 3'UTR, was amplified from a *MOM1* cDNA (Accession No. AF213627) clone using specific primers (At3'asF *Pst* I, 5'-GCTCCTCTGCAGCCTCAGGCATCTTC-3' and At3'asR *Xho* I, 5'-AGAGACTCGAGCCAACGAGTCGGTTC-3'), including recognition sites for different restriction endonucleases. Similarly, another set of primers (At3'sF *Xba* I, 5'-GGCTCCTCTAGAGCCTCAGGCATCT-3' and At3'sR *Sal* I, 5'-AGAGACCGTCGACAACGAGTCGGTTC-3') was used to amplify the same *MOM1* cDNA fragment.

For inverted repeat *MOM* (*IRMOM*) constructs driven either by the *PR-1* promoter of *Arabidopsis thaliana* or the CaMV35S promoter, a synthetic intron *syn7* (Goodal and Filipowicz, 1989) was inserted at *Xba* I and *Pst* I sites between the CaMV35S-promoter and terminator in the pDH51 (Pietrzak *et al.*, 1986) plasmid. A PCR-amplified *MOM* fragment was digested with *Xho* I and *Pst* I and cloned in antisense orientation between the *syn7* intron and the CaMV35S terminator in pDH51, resulting in pDH35Sas*MOM*. Similarly a second PCR-amplified, *Xba* I and *Sal* I-digested *MOM1* fragment was cloned in sense orientation between the CaMV35S-promoter and the *syn7* intron, resulting in pDH35S-*IRMOM*. Finally, the 35S-*IRMOM* cassette was excised by *Eco* RI and inserted into pCambia1300 (Accession No. AF234296) binary vector, resulting in the pC35S-*IRMOM* used for plant transformation.

For the *PR1-IRMOM* construct, the pDH35S-*IRMOM* was digested with *Bam* HI and *Sac* I to release the *IRMOM* cassette, which was then cloned into *Bam* HI and *Sac* I sites

downstream of the 4258-bp *PR-1* promoter of *A. thaliana* (Lebel *et al.*, 1998) to yield p*PR1-IRMOM*. The *PR1-IRMOM* cassette from p*PR1-IRMOM* was moved as an *Eco* RI fragment to pCambia1300 to generate p*CPR1-IRMOM*, which was used for plant transformation. p*C35S-IRMOM* and p*CPR1-IRMOM* were introduced into *A. thaliana* line 6b5 by *in planta* vacuum infiltration (Bechtold *et al.*, 1993).

***Act2 (Actin2) primer sequence***

*Act2F*: CTAAGCTCTCAAGATCAAAGGC

*Act2R*: AACATTGCAAAGAGTTTCAAGG

## References

- Bechtold, N., Ellis, J. and Pelletier, G. (1993) In planta *Agrobacterium* mediated gene transfer by infiltration of adult *Arabidopsis thaliana* plants. *C. R. Acad. Sci. Paris, Life Sci.*, **316**, 1194-1199.
- Goodall, G.J. and Filipowicz, W. (1989) The AU-rich sequences present in the introns of plant nuclear pre-mRNAs are required for splicing. *Cell*, **58**, 473-483.
- Lebel, E., Heifetz, P., Thorne, L., Uknes, S., Ryals, J. and Ward, E. (1998) Functional analysis of regulatory sequences controlling PR-1 gene expression in *Arabidopsis*. *Plant J.*, **16**, 223-233.
- Pietrzak, M., Shillito, R. D., Hohn, T. and Potrykus, I. (1986) Expression in plants of two bacterial antibiotic resistance genes after protoplast transformation with a new plant expression vector. *Nucleic Acids Res.*, **14**, 5857-5868.
